# Supplementary material
Source: PubMed Central journal article supplement (PMC4684771)

**Branched chain amino acid catabolism fuels adipocyte differentiation and lipogenesis**

Courtney R. Green<sup>a</sup>, Martina Wallace<sup>a</sup>, Ajit S. Divakaruni<sup>b</sup>, Susan A. Phillips<sup>c,d</sup>, Anne N. Murphy<sup>b</sup>, Theodore P. Ciaraldi<sup>c,d</sup>, Christian M. Metallo<sup>\*a,e</sup>

Departments of <sup>a</sup>Bioengineering and <sup>b</sup>Pharmacology, University of California–San Diego, La Jolla, CA 92093.

<sup>c</sup>Veterans Affairs San Diego Healthcare System, San Diego, CA; Department of Medicine, University of California, San Diego, La Jolla, CA.

<sup>d</sup>Medicine, University of California, San Diego, La Jolla, CA.

<sup>e</sup>Institute of Engineering in Medicine, University of California, San Diego, La Jolla, CA

To whom correspondence should be addressed: Christian M. Metallo, Department of Bioengineering, University of California, San Diego, 9500 Gilman Drive, MC–0412 PFBH 204, La Jolla, CA 92093, USA, Tel.: (858) 534–8209; E–mail: cmetalloy@eng.ucsd.edu

## Supplementary Results

**Supplementary Table 1.** Simplified network for Isotopomer Spectral Analysis (ISA)

| <b>Contribution to lipogenic AcCoA (%)</b> | <b>Description</b>                                 |
|--------------------------------------------|----------------------------------------------------|
| AcM1.l (ab) → Ac (ab)                      | (AcCoA containing 1 <sup>13</sup> C tracer label)  |
| AcM2.l (ab) → Ac (ab)                      | (AcCoA containing 2 <sup>13</sup> C tracer labels) |
| Ac.d (ab) → Ac (ab)                        | (unlabeled AcCoA)                                  |
| 7*Ac (ab) → Myr.s (abcdefghijklmn)         |                                                    |
| 8*Ac (ab) → Palm.s (abcdefghijklmnop)      |                                                    |
| 9*Ac (ab) → Oleate.s (abcdefghijklmnoqr)   |                                                    |
| 9*Ac (ab) → Stear.s (abcdefghijklmnoqr)    |                                                    |
| <b><i>de novo</i> lipogenesis</b>          |                                                    |
| Myr.s → Myr                                | Newly synthesized myristate                        |
| Myr.d → Myr                                | Pre-existing (unlabeled) myristate                 |
| 0*Myr.s + 0*Myr.d → Myr.m                  | Mixing of pools for measurement                    |
| Palm.s → Palm                              | Newly synthesized palmitate                        |
| Palm.d → Palm                              | Pre-existing (unlabeled) palmitate                 |
| 0*Palm.s + 0*Palm.d → Palm.m               | Mixing of pools for measurement                    |
| Oleate.s → Oleate                          | Newly synthesized oleate                           |
| Oleate.d → Oleate                          | Pre-existing (unlabeled) oleate                    |
| 0*Oleate.s + 0*Oleate.d → Oleate.m         | Mixing of pools for measurement                    |
| Stearate.s → Stearate                      | Newly synthesized stearate                         |
| Stearate.d → Stearate                      | Pre-existing (unlabeled) stearate                  |
| 0*Stearate.s + 0*Stearate.d → Stearate.m   | Mixing of pools for measurement                    |

Supplementary Results

**Supplementary Table 2.** Control and Low Gluc+AA media formulation

| <b>Amino Acid</b> | <b>Control (mM)</b> | <b>Low Gluc+AA (mM)</b> |
|-------------------|---------------------|-------------------------|
| D-glucose         | 25                  | 6                       |
| L-glutamine       | 4                   | 1                       |
| L-arginine        | 0.4                 | 0.1                     |
| L-cystine         | 0.2                 | 0.05                    |
| Glycine           | 0.4                 | 0.1                     |
| L-histidine       | 0.2                 | 0.05                    |
| L-isoleucine      | 0.8                 | 0.2                     |
| L-leucine         | 0.8                 | 0.2                     |
| L-lysine HCl      | 0.8                 | 0.2                     |
| L-methionine      | 0.2                 | 0.05                    |
| L-phenylalanine   | 0.4                 | 0.1                     |
| L-serine          | 0.4                 | 0.1                     |
| L-threonine       | 0.8                 | 0.2                     |
| L-tryptophan      | 0.078               | 0.02                    |
| L-tyrosine        | 0.4                 | 0.1                     |
| L-valine          | 0.8                 | 0.2                     |

## Supplementary Results

**Supplementary Table 3.** Metabolite fragment ions used for GC–MS analysis.

| <b>Metabolite</b>      | <b>Carbons</b> | <b>Formula</b>                                                  | <b>Mass (m/z)</b> |
|------------------------|----------------|-----------------------------------------------------------------|-------------------|
| Leucine                | 23456          | C <sub>13</sub> H <sub>32</sub> NOSi <sub>2</sub>               | 274–280           |
| Isoleucine             | 23456          | C <sub>11</sub> H <sub>26</sub> NSi                             | 200–206           |
| Isoleucine             | 23456          | C <sub>13</sub> H <sub>32</sub> NOSi <sub>2</sub>               | 274–280           |
| Valine                 | 2345           | C <sub>12</sub> H <sub>30</sub> NOSi <sub>2</sub>               | 260–268           |
| Valine                 | 12345          | C <sub>13</sub> H <sub>30</sub> NO <sub>2</sub> Si <sub>2</sub> | 288–296           |
| Methylmalonate         | 1234           | C <sub>12</sub> H <sub>25</sub> O <sub>4</sub> Si <sub>2</sub>  | 289–295           |
| Myristate (C14:0)      | 1–14           | C <sub>15</sub> H <sub>30</sub> O <sub>2</sub>                  | 242–258           |
| Pentadecanoate (C15:0) | 1–15           | C <sub>16</sub> H <sub>32</sub> O <sub>2</sub>                  | 256–272           |
| Palmitate (C16:0)      | 1–16           | C <sub>17</sub> H <sub>34</sub> O <sub>2</sub>                  | 270–284           |
| Heptadecanoate (C17:0) | 1–17           | C <sub>18</sub> H <sub>37</sub> O <sub>2</sub>                  | 284–294           |
| Oleate (C18:1)         | 1–18           | C <sub>19</sub> H <sub>36</sub> O <sub>2</sub>                  | 296–310           |
| Stearate (C18:0)       | 1–18           | C <sub>19</sub> H <sub>38</sub> O <sub>2</sub>                  | 298–316           |



## Supplementary Results

**Supplementary Table 4.** Primer sequences used in gene expression analysis.

| <b>Gene Name</b>                                        | <b>Forward sequence</b> | <b>Reverse Sequence</b> |
|---------------------------------------------------------|-------------------------|-------------------------|
| Ppar $\gamma$ ( <i>Pparg</i> )                          | TTCGCTGATGCACTGCCTAT    | ACAGACTCGGCACTCAATGG    |
| Adiponectin ( <i>Adipoq</i> )                           | GACACCAAAGGGCTCAGGA     | GCCCTTCAGCTCCTGTCATT    |
| Leptin ( <i>Lep</i> )                                   | GGGAGGAAAATGTGCTGGAGAC  | AAGCCCAGGAATGAAGTCCAA   |
| Glucose transporter type 4 ( <i>Glut4</i> )             | AGCCTCTGATCATCGCAGTG    | ACTAAGAGCACCGAGACCAAC   |
| Perilipin 4 ( <i>Plin4</i> )                            | GTGTCCACCAACTCACAGATG   | GGACCATTCTTTTGCAGCAT    |
| Branched-chain ketoacid dehydrogenase ( <i>Bckdha</i> ) | TGGCTAGATCTCACCCCAGCA   | AGAGAATGCGGTCCATGGTG    |
| 18S rRNA                                                | AGTCCCTGCCCTTTGTACACA   | CGATCCGAGGGCCTCACTA     |

### Supplementary Table Legends

**Table 1.** Summary of Isotopomer Spectral Analysis (ISA) network for determination of substrate contribution to lipogenic AcCoA and rate of *de novo* lipogenesis in differentiated adipocytes.

**Table 2.** Control and Low Gluc+AA media formulation denoting those substrates with differing concentrations. All other trace components, lipids, vitamins, salts, etc. present in DMEM media were unchanged.

**Table 3.** Fragment ions formula and m/z range used to quantify metabolite abundances.

**Table 4.** Primer sequences used in gene expression analysis.

### Supplementary Figure Legends

#### Supplementary Figure 1. Adipocyte differentiation reprograms intracellular metabolism

(a) Phase contrast image of differentiated 3T3-L1 adipocytes with Oil Red O staining of lipids.

(b) Palmitate labeling from [U-<sup>13</sup>C<sub>6</sub>]glucose tracer in 3T3-L1 pre-adipocytes and adipocytes.

(c) Palmitate labeling from [U-<sup>13</sup>C<sub>5</sub>]glutamine tracer in 3T3-L1 pre-adipocytes and adipocytes.

(d) Absolute lipogenic flux to palmitate synthesis from [U-<sup>13</sup>C<sub>6</sub>]glucose and [U-<sup>13</sup>C<sub>5</sub>]glutamine in 3T3-L1 pre-adipocytes and adipocytes.

(e) Efflux of glutamine synthesized from [U-<sup>13</sup>C<sub>6</sub>]glucose.

Data shown in (b)–(e) are 3 technical replicates representative of 3 biological replicates. Data presented in (b)–(e) represent mean ± s.d.

#### Supplementary Figure 2. Mitochondrial metabolism is supported by BCAA catabolism

(a) Summary of BCAA catabolism and carbon atom transitions from each BCAA tracer.

Enzyme key: 1: Branched chain amino transferase, 2: Branched-chain ketoacid DH/lipoamide, 3: Isovaleryl-CoA DH, 4: Acyl-CoA DH (ACAD) short branched-chain (ACADSB) or ACAD short-chain (ACADS), 5: ACAD8 or ACADSB or ACADS, 6: Methylcrotonyl-CoA carboxylase, 7: Methylglutaconyl-CoA hydratase, 8: Enoyl-CoA hydratase, 9: 3-hydroxy-2-methylbutyryl-CoA DH, 10: 3-hydroxyisobutyryl-CoA hydrolase, 11: Hydroxymethylglutaryl-CoA lyase, 12: Acetyl-CoA acyltransferase, 13: 3-hydroxyisobutyrate DH, 14: Methylmalonate semialdehyde DH, 15: Propionyl-CoA carboxylase, 16: Methylmalonyl-CoA mutase; Abbreviations: αKG: α-ketoglutarate; glut: glutamate; Oac: oxaloacetate; FA: fatty acid; AdoCbl: 5'-adenosylcobalamin, DH: dehydrogenase.

(b) Mole percent enrichment (MPE) of citrate from [U-<sup>13</sup>C<sub>6</sub>]glucose and [U-<sup>13</sup>C<sub>6</sub>]leucine over 3-hour time points.

(c) MPE of TCA cycle intermediates from [U-<sup>13</sup>C<sub>6</sub>]leucine and [U-<sup>13</sup>C<sub>6</sub>]isoleucine.

(d) Citrate labeling from [U-<sup>13</sup>C<sub>6</sub>]leucine in 3T3-L1 adipocytes in the presence of tracer for 24 hours beginning on the indicated day of differentiation.

Data shown in (b)–(d) are 3 technical replicates representative of 3 biological replicates. Data presented in (b)–(d) represent mean ± s.d.

#### Supplementary Figure 3. BCAA catabolites are oxidized and used for DNL

(a) Ratio of the substrate-specific oxygen consumption rate (OCR) of adipocytes to pre-adipocytes. Substrate key: M: malate; KIC-M: keto-isocaproate-malate; KMV-M: keto-methylvalerate-malate; KIV: keto-isovalerate; P-M: pyruvate-malate; S-R: succinate-rotenone;

## Supplementary Results

G–M: glutamate–malate. Data shown are from at least 5 biological replicates, each with 4 technical replicates; \*represents  $p < 0.05$ , \*\*represents  $p < 0.01$ , and \*\*\*represents  $p < 0.001$  analyzed via one–way ANOVA with Holm–Sidak’s multiple comparisons test.

**(b)** Contribution to lipogenic AcCoA from  $[U-^{13}C_6]$ leucine in 3T3–L1 adipocytes in the presence of tracer for 24 hours beginning on the indicated day of differentiation.

**(c)** Even–chain fatty acid accumulation in 3T3–L1 adipocytes in the presence of tracer for 24 hours beginning on the indicated day of differentiation.

Data shown in **(a)** represent at least 5 biological replicates, each with 4 technical replicates. Data in **(b)–(c)** are 3 technical replicates representative of 3 biological replicates. Data plotted in **(a)–(c)** represent mean  $\pm$  s.d.

### Supplementary Figure 4. Protein catabolism supports BCAA metabolism

**(a)** Total intracellular FA in 3T3–L1 cells between control and Low Gluc+AA conditions.

**(b)** FA growth rates obtained via ISA analysis in control and Low Gluc+AA conditions.

**(c)** Sum of M1–M5 labeled glutamine in  $[U-^{13}C_6]$ glucose tracer medium in control or Low Gluc+AA conditions. \*\*\*represents  $p < 0.001$  determined via Student’s t–test.

Data in **(a)–(c)** are 3 technical replicates representing 3 biological replicates and are presented as mean  $\pm$  s.d.

### Supplementary Figure 5. Cobalamin supplementation alters 3T3–L1 metabolism

**(a)** Representative GC/MS chromatogram of BCAAs, norvaline internal standard, and methylmalonate (MMA) under normal culture conditions.

**(b)** Methylmalonate (MMA) and **(c)** C15:0 labeling from  $[U-^{13}C_6]$ isoleucine and  $[U-^{13}C_5]$ valine in 3T3–L1 adipocytes.

**(d)** C17:0 abundance in cells cultured in DMEM +10% FBS and above cobalamin concentrations beginning on Day 0 of differentiation.

**(e)** MMA level in 3T3–L1 adipocytes after culture with 500 nM cobalamin or 100 nM AdoCbl. Asterisks denote significance compared to control after statistical analysis via two–way ANOVA.

**(f)** Fumarate labeling from  $[U-^{13}C_5]$ valine in control and +cobalamin conditions.

**(g)** Malate labeling from  $[U-^{13}C_5]$ valine in control and +cobalamin conditions.

Mole percent enrichment (MPE) in TCA intermediates from **(h)**  $[U-^{13}C_5]$ valine and **(i)**  $[U-^{13}C_6]$ glucose in 3T3–L1 adipocytes in normal culture conditions with and without 500 nM cobalamin supplementation.

Data in **(b)–(i)** are 3 technical replicates representing 3 biological replicates and are presented as mean  $\pm$  s.d. \*represents  $p < 0.05$ , \*\*represents  $p < 0.01$ , and \*\*\*represents  $p < 0.001$  determined via Student’s t–test unless otherwise noted.

### Supplementary Figure 6.

**(a)** Full, uncropped Western blot images.

# Supplementary Figure 1

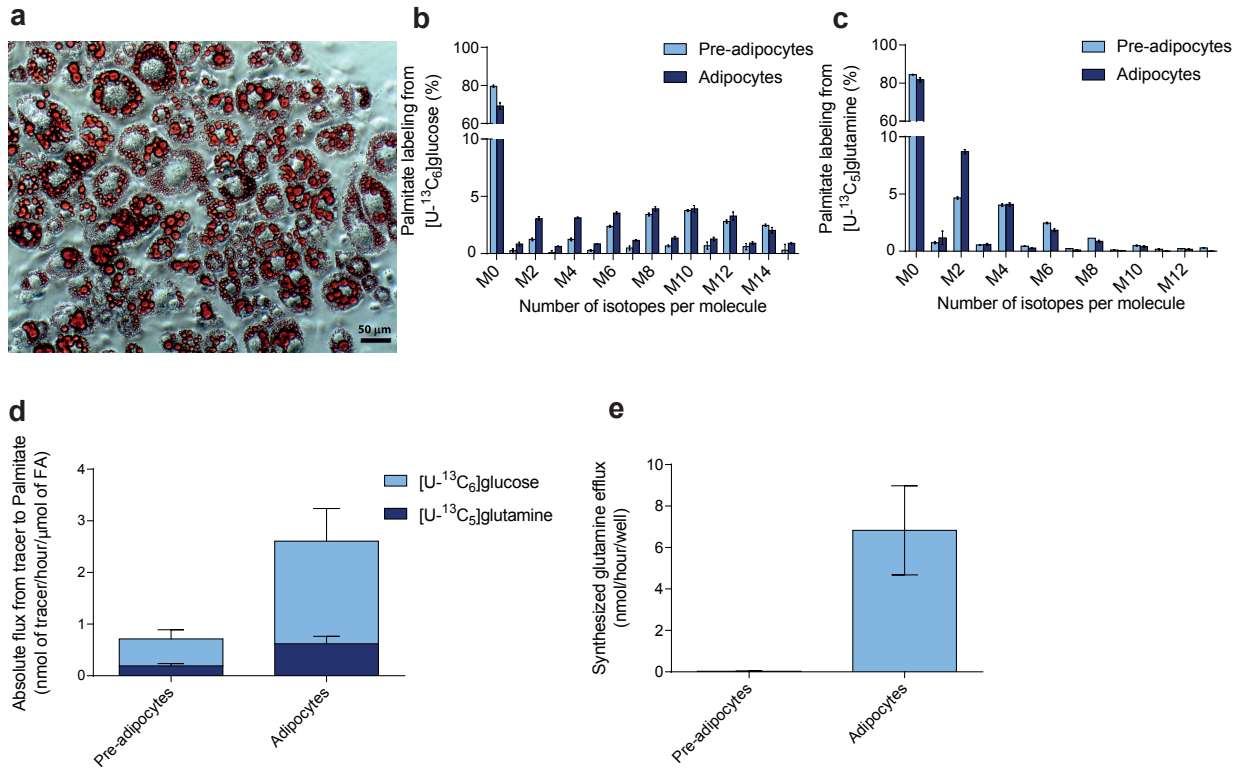

## Supplementary Figure 2

**a**

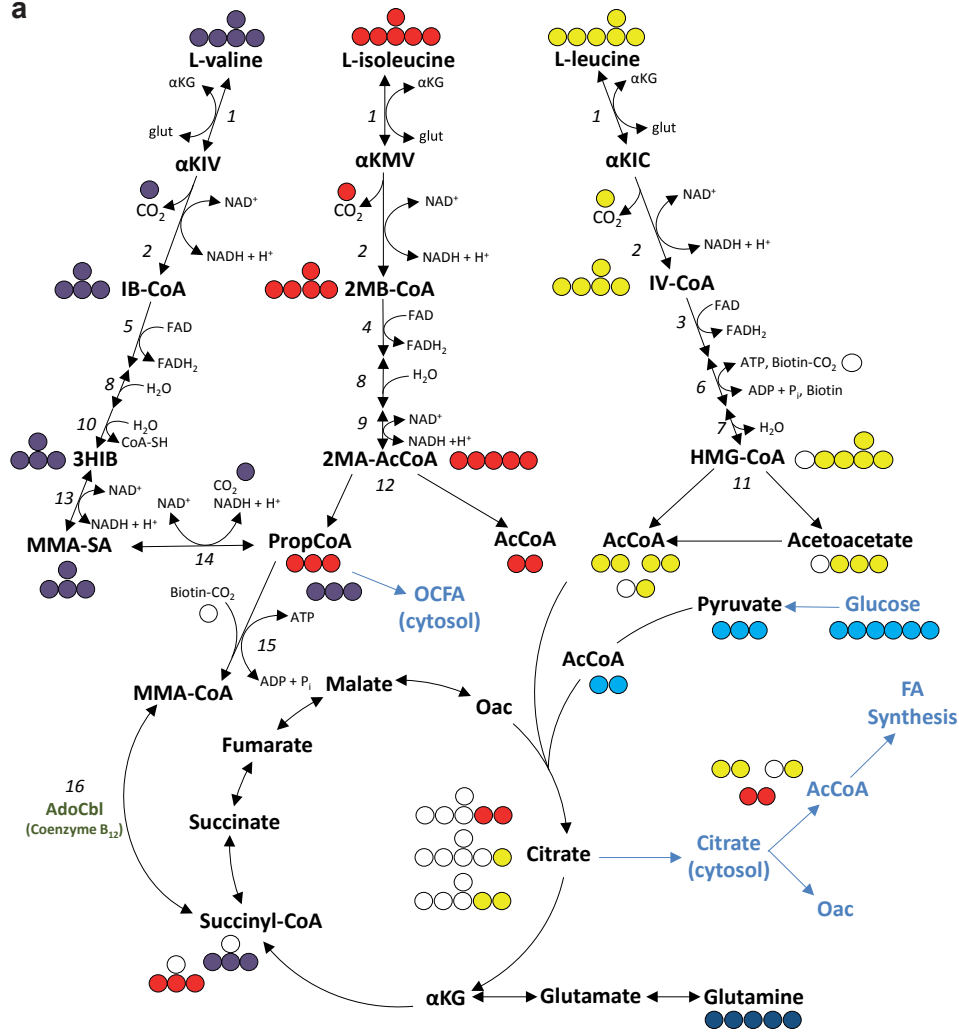

**b**

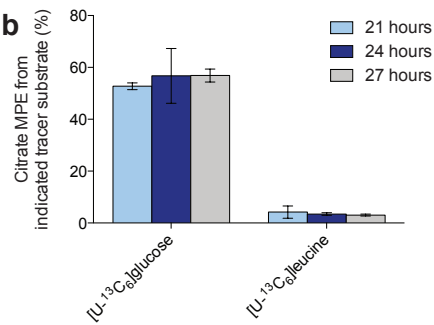

**c**

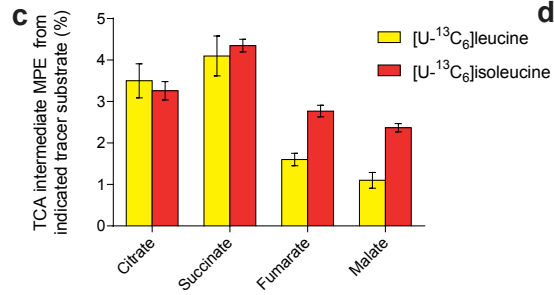

**d**

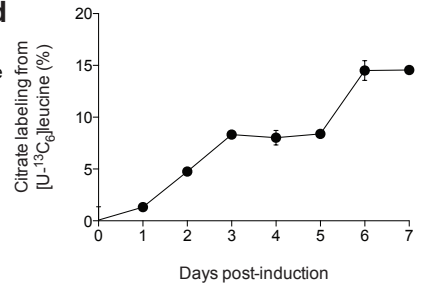

### Supplementary Figure 3

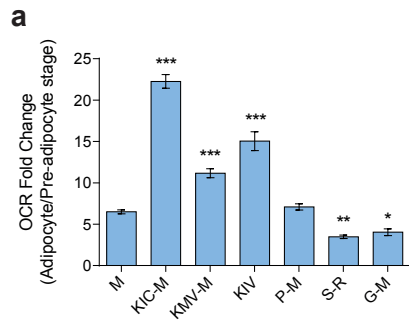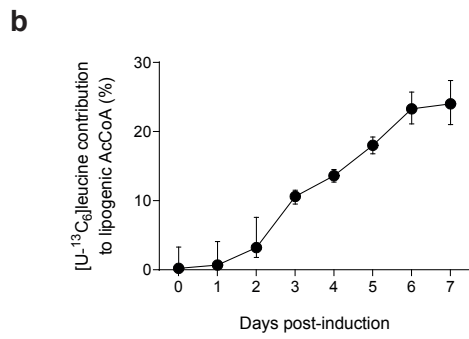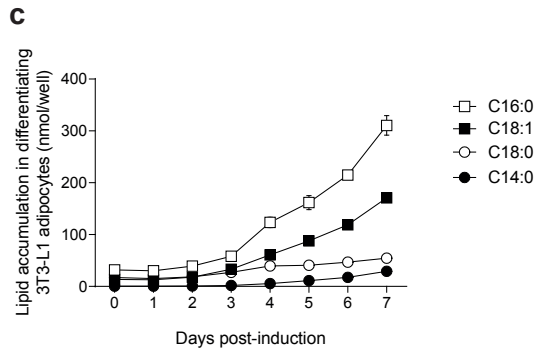

## Supplementary Figure 4

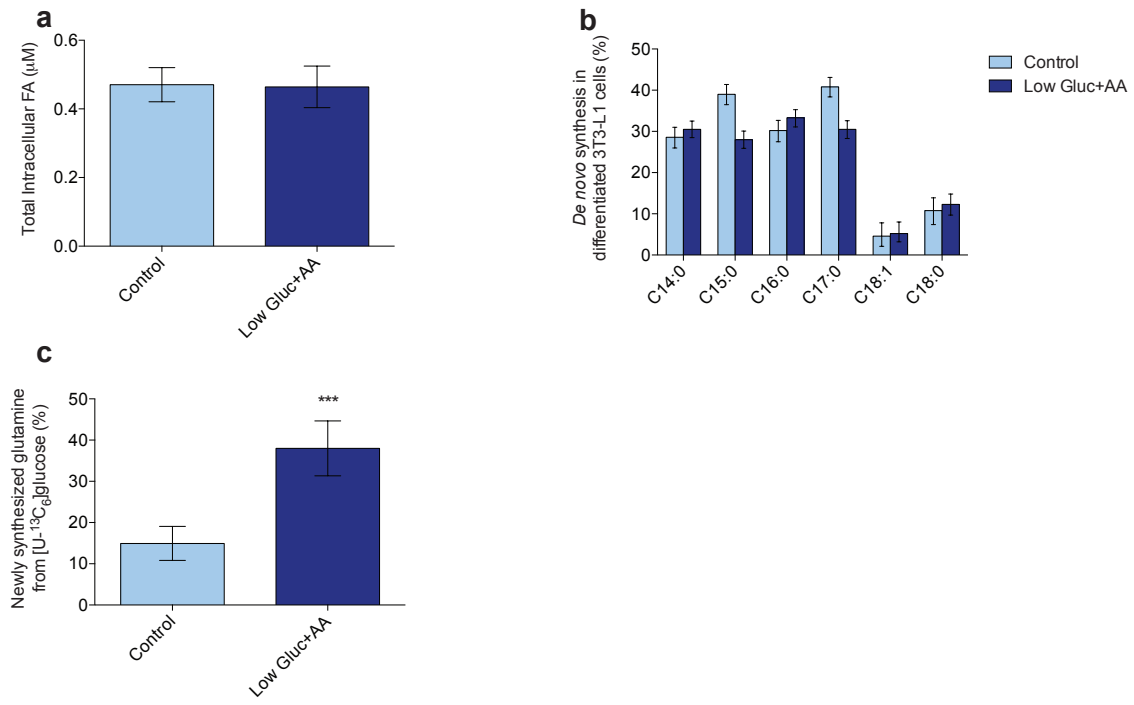

# Supplementary Figure 5

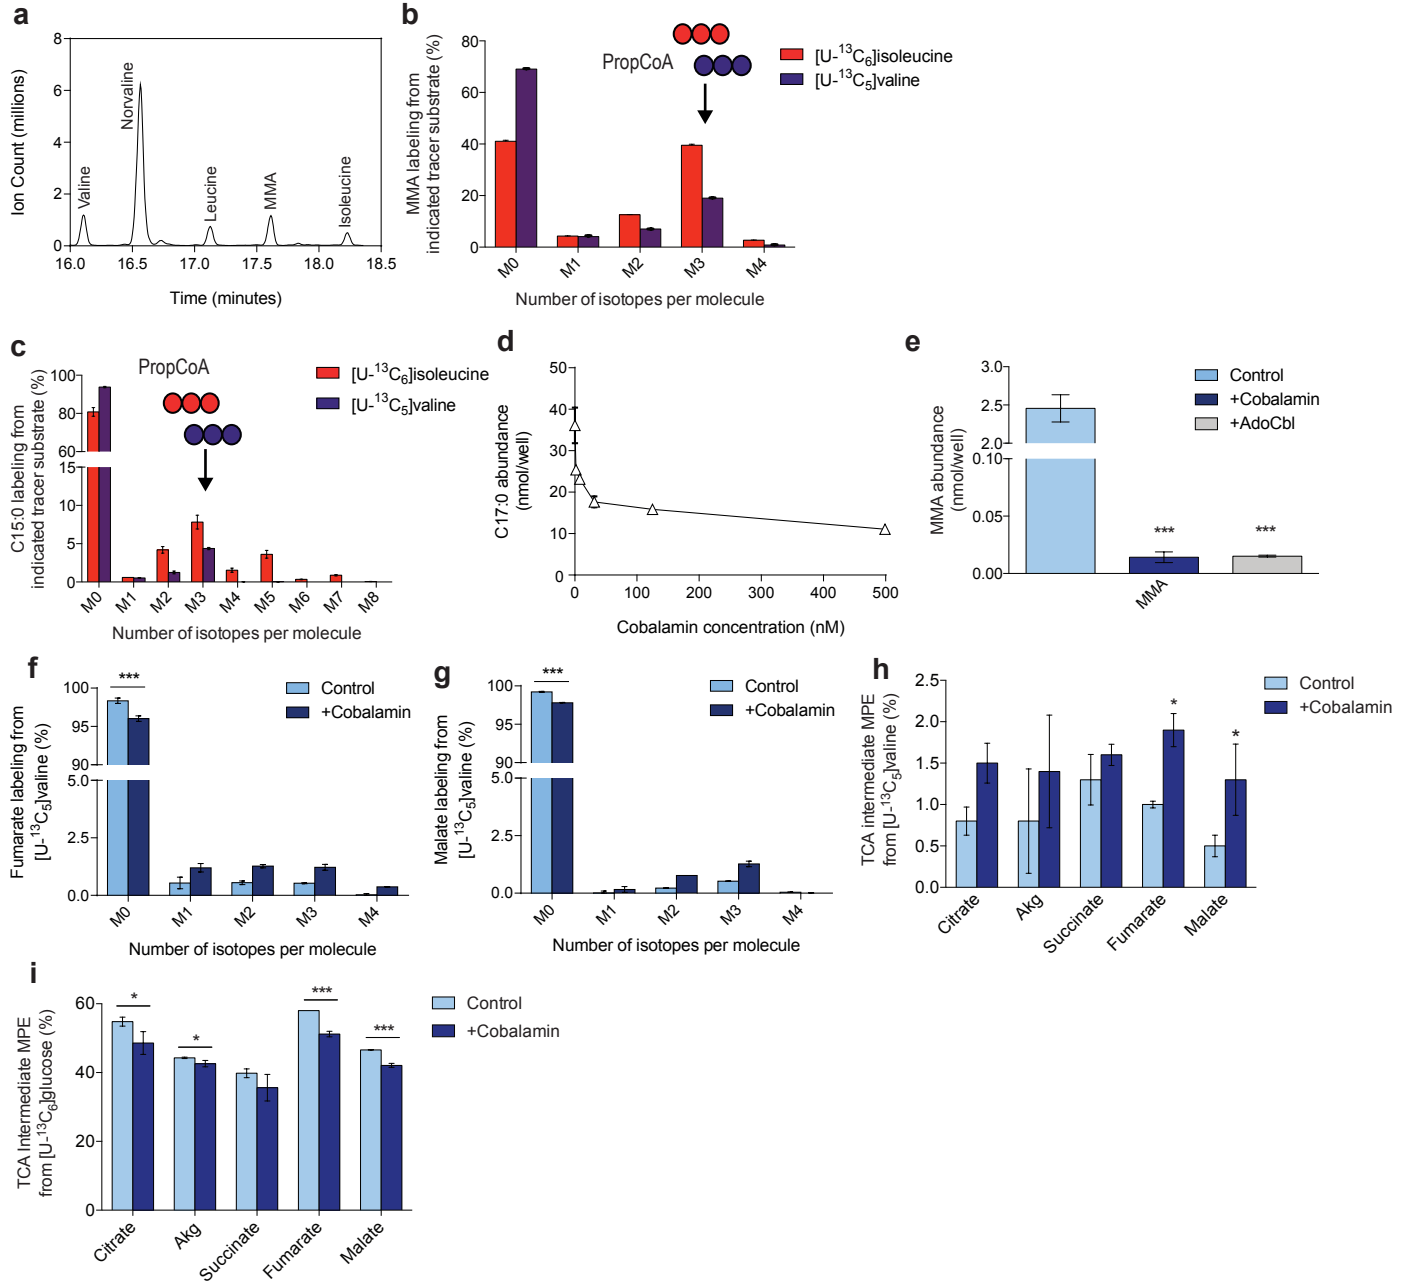



Supplementary Figure 6

a

Bckdha

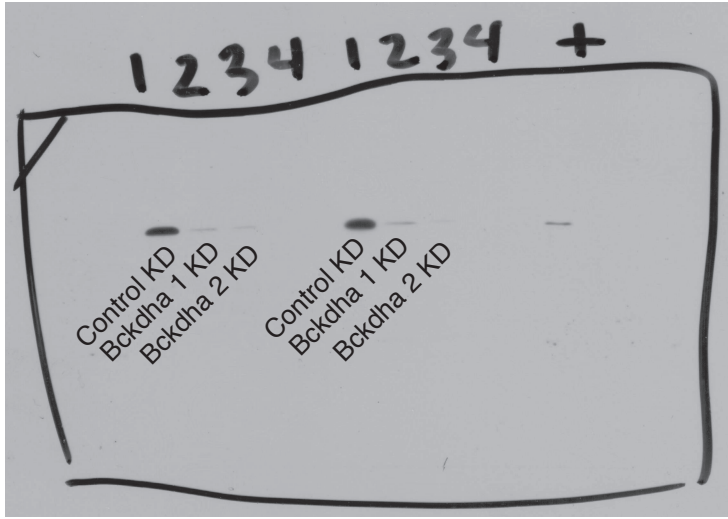

$\beta$ -Actin

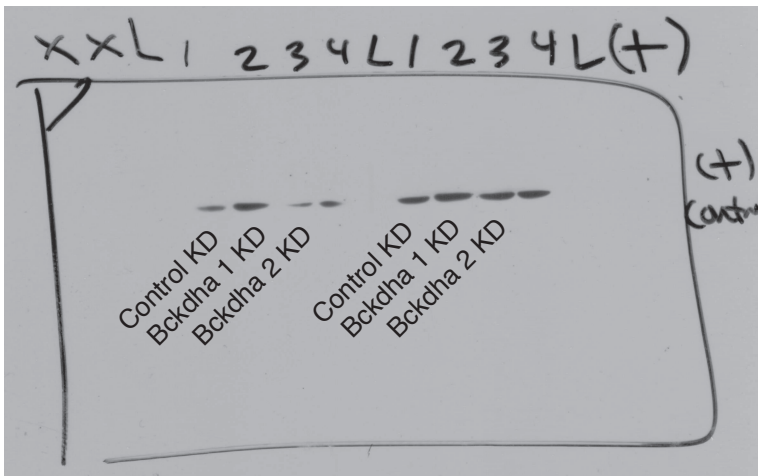

Supplement: NIHMS729284-supplement-1.pdf [file NIHMS729284-supplement-1.pdf]
